# Supplementary material for: ATP/ADP modulates gp16–pRNA conformational change in the Phi29 DNA packaging motor
Source: PubMed Central journal article supplement (PMC6765105; doi:10.1093/nar/gkz692), 2019-08-09
Supplement: gkz692_supplemental_file.pdf [file gkz692_supplemental_file.pdf]

# Supplementary Information for

## **ATP/ADP Modulates gp16-pRNA Conformational Change in The Phi29 DNA Packaging Motor**

Rujie Cai<sup>1</sup>, Ian R. Price<sup>2</sup>, Fang Ding<sup>2</sup>, Feifei Wu<sup>1</sup>, Ting Chen<sup>1</sup>, Yunlong Zhang<sup>1</sup>,  
Guangfeng Liu<sup>3</sup>, Paul J. Jardine<sup>4</sup>, Changrui Lu<sup>1\*</sup>, Ailong Ke<sup>2\*</sup>

<sup>1</sup>Key Laboratory of Science and Technology of Eco-Textiles, Ministry of Education, College of Chemistry, Chemical Engineering and Biotechnology, Donghua University, Shanghai, 201620, China;

<sup>2</sup>Department of Molecular Biology and Genetics, Cornell University, Ithaca, NY, 14853, USA;

<sup>3</sup>National Center for Protein Science Shanghai, Shanghai Advanced Research Institute, Chinese Academy of Sciences, Shanghai 201204, China;

<sup>4</sup>Department of Diagnostic and Biological Sciences, and Institute for Molecular Virology, University of Minnesota, Minneapolis, MN 55455, USA;

\*To whom correspondence should be addressed. Tel: 86-21-67792740; (607) 255-3945. Fax: (607) 255-6249  
E-mails: crlu@dhu.edu.cn; ak425@cornell.edu.

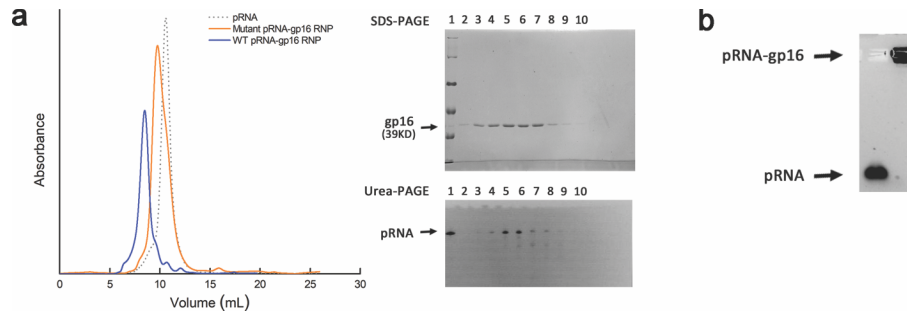

**Supplemental Figure 1.** pRNA and gp16 interaction in solution. (a) Size exclusion chromatographic (SEC) analysis of wild type pRNA-gp16 RNP and mutant pRNA-gp16 RNP. Mutant pRNA-gp16 RNP complex was collected and confirmed by SDS-PAGE and Urea-PAGE (shown with arrow). The SDS-PAGE lane 1: protein marker; lanes 2-10: peak fractions. The Urea-PAGE lane 1: 174-base pRNA as compared; lanes 2-10: peak fractions. (b) EMSA of pRNA incubated with gp16.

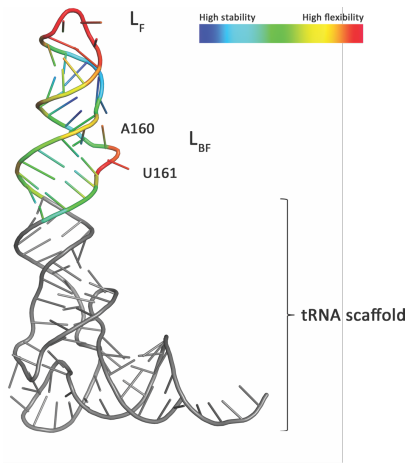

**Supplemental Figure 2.** B factor analysis shows the flexibility of the pRNA domain II. Individual nucleotides are colored from blue to red, based on their temperature B factors ranging from 100 to 240. Significantly higher B factors at the  $L_F$ , unpaired A160 and U161 residues in  $L_{BF}$  are shown in red. tRNA scaffold is shown in grey.

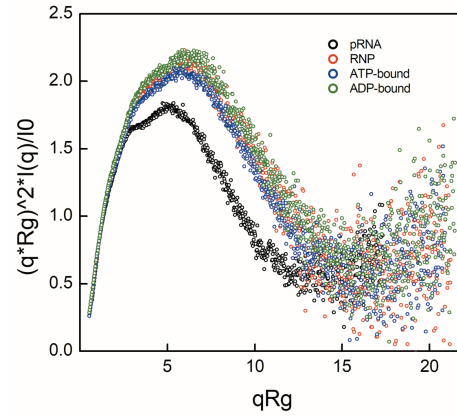

**Supplemental Figure 3.** Dimensionless Kratky plots. pRNA (black), RNP (red), ATP-bound (blue) and ADP-bound (green) pRNA-gp16 RNP show a typical peak at low scattering angle and then return to baseline, suggesting that all particles are in the native state.

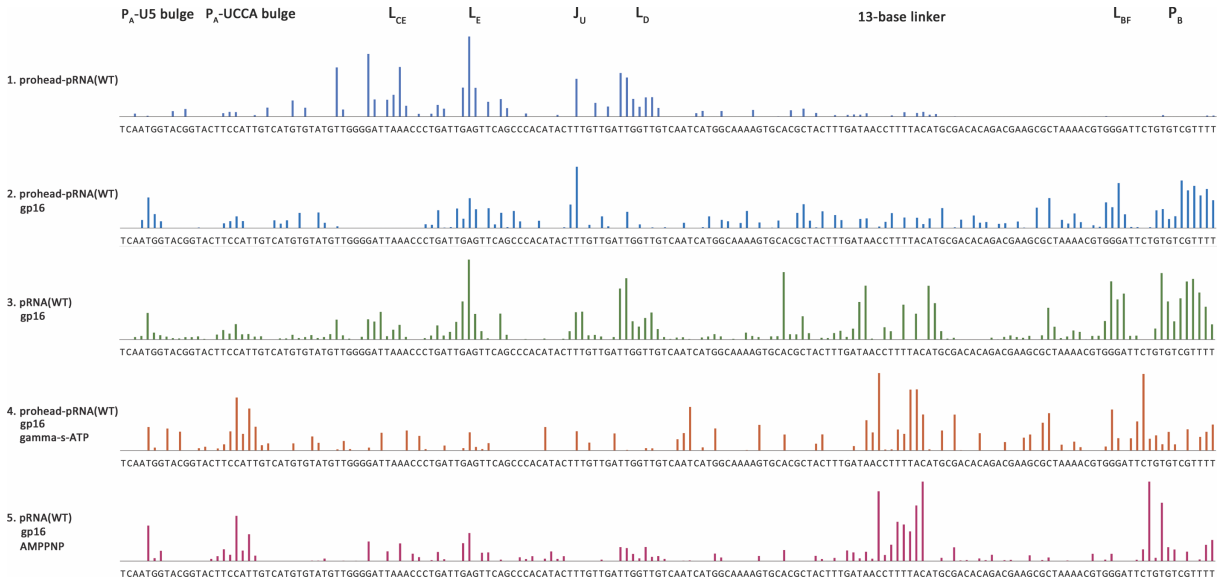

**Supplemental Figure 4.** SHAPE analysis shows the ATPase gp16 binding sites and the pRNA-gp16 RNP conformational change modulating by ATP. Positive bars indicate structural rigidity. Row 1 shows protection by prohead binding. Row 2 row 3 bars represent protection by gp16 binding to prohead-pRNA and free wild-type pRNA. Row 4 shows protection caused by gamma-s-ATP binding to prohead-pRNA-gp16 complex. Row 5 represents the AMPPNP-induced protection in free wild-type pRNA-gp16 RNP.

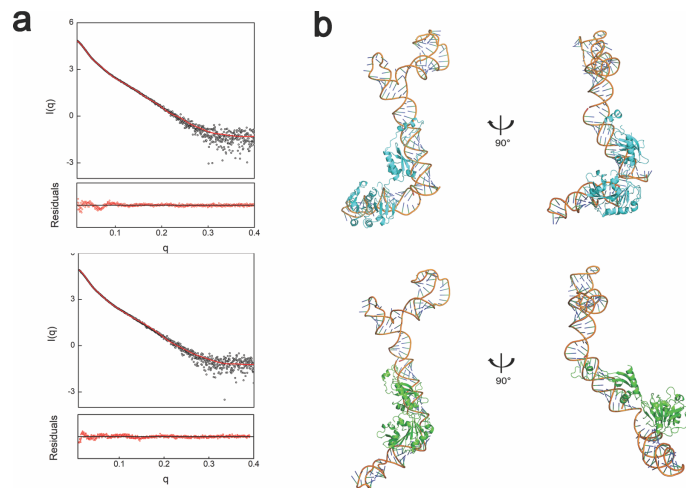

**Supplemental Figure 5.** (a) FoXS of the ATP-bound RNP (upper) and ADP-bound RNP (lower). (b) SASREF model of ATP-bound RNP (upper) and ADP-bound RNP (lower).

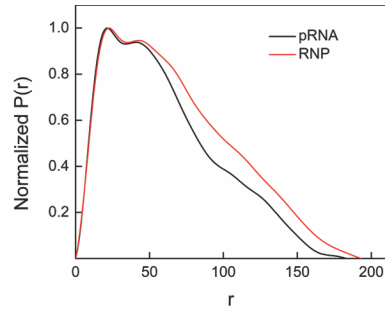

**Supplemental Figure 6.** Normalized  $P(r)$  analysis. Compare the properties of the pRNA (black) and pRNA-gp16 RNP (red).

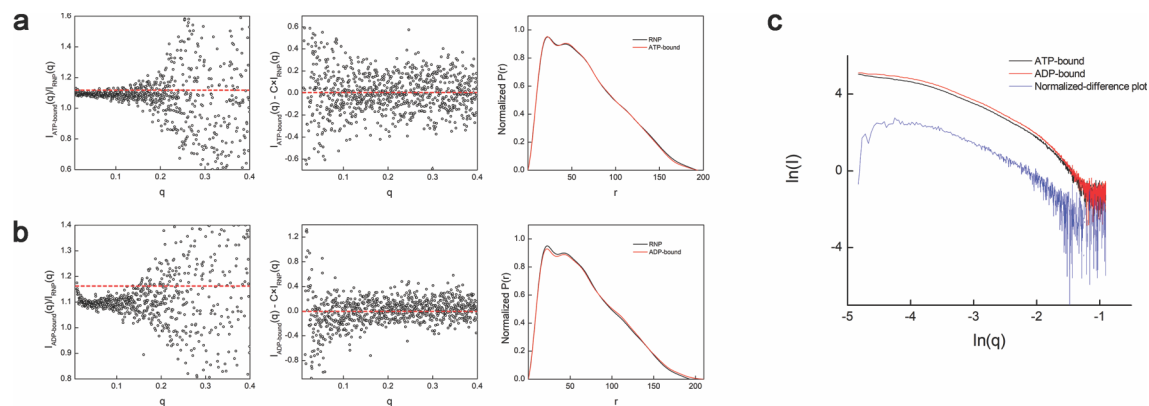

**Supplemental Figure 7.** Scattering curve comparisons between ADP-bound/ ATP-bound with apo RNP. (a) Difference plot of ATP-bound RNP with apo RNP. (b) Difference plot of ADP-bound RNP with apo RNP. (c) Log-Log plot analysis of ATP-bound RNP (black) and ADP-bound RNP (red).



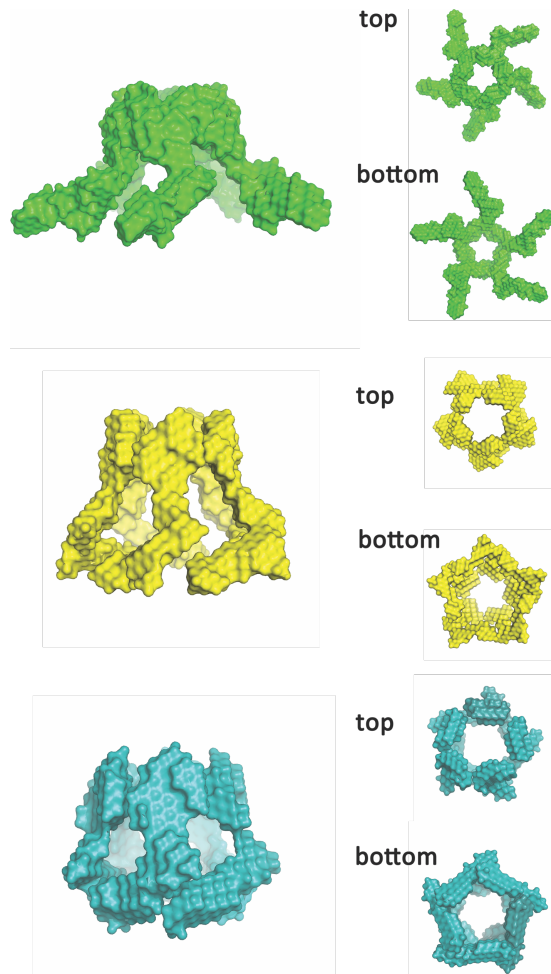

**Supplemental Figure 8.** Top-down image of pentameric 3D models of ADP-bound RNP (green), apo RNP (yellow) and ATP-bound RNP (cyan).

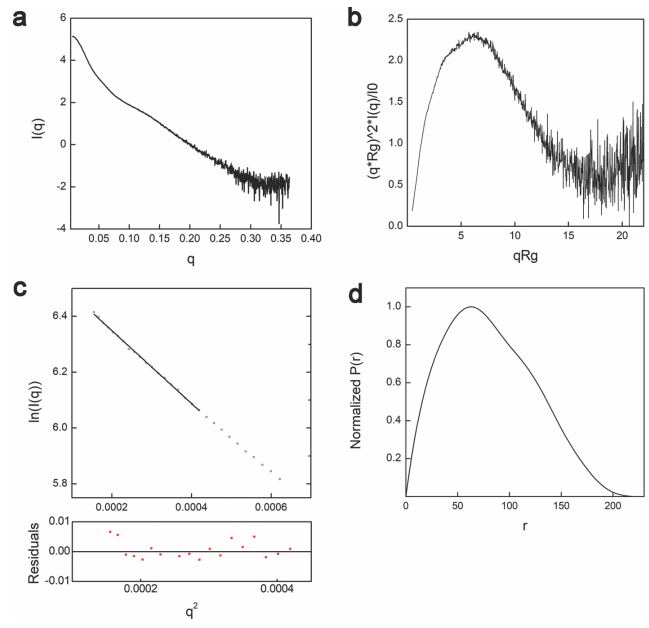

**Supplemental Figure 9.** SAXS curves of WT pRNA-gp16 RNP. (a) Scattering curve. (b) Dimensionless Kratky plots. (c) Guinier plot (d) Normalized  $P(r)$  analysis.

**Supplemental Table 1. Crystallographic statistics**

---

| pRNA domain II- tRNA cobalt Hex              |                        |
|----------------------------------------------|------------------------|
| <b>Data Collection</b>                       |                        |
| Beamline                                     | APS 24 ID-C            |
| Wavelength (Å)                               | 1.606                  |
| Space group                                  | I422                   |
| Unit cell (a, b, c)                          | 120.18, 120.18, 187.49 |
| Resolution range (Å)                         | 101.18-3.32            |
| Multiplicity                                 | 8.5                    |
| Completeness (%)                             | 98.2                   |
| Mean I/sigma(I)                              | 13.9                   |
| Wilson B-factor (Å <sup>2</sup> )            | 160.7                  |
| R-merge                                      | 0.106                  |
| R-meas(I)                                    | 0.114                  |
| Rpim(I)                                      | 0.041                  |
| Total observations                           | 89650                  |
| Unique reflections                           | 10506                  |
| <b>Refinement</b>                            |                        |
| Resolution (Å)                               | 3.3                    |
| Total non-hydrogen atoms                     | 2077                   |
| Number of Unique reflections refined against | 9296                   |
| RMS (bonds, Å)                               | 0.49                   |
| RMS (angles, °)                              | 0.72                   |
| Clash score                                  | 6                      |
| R <sub>work</sub> /R <sub>free</sub>         | 0.223/ 0.265           |
| Average B-factor (Å <sup>2</sup> )           | 162                    |

---

**Supplemental Table 2. SAXS sample details and parameters**

|                                              | pRNA                                                         | RNP           | AMP-PNP      | ADP           |
|----------------------------------------------|--------------------------------------------------------------|---------------|--------------|---------------|
| SEC-SAXS column                              | Superdex 200 Increase 10/300 GL                              |               |              |               |
| Loading concentration (mg/ml <sup>-1</sup> ) | 7.5                                                          | 6.5           | 6.8          | 7             |
| Injection volume (μl)                        | 100                                                          | 100           | 100          | 100           |
| Flow rate (ml/min <sup>-1</sup> )            | 0.3                                                          | 0.3           | 0.3          | 0.3           |
| Solvent                                      | 25 mM Tris-HCl pH 7.5~7.9, 50 mM NaCl, 5mM Mgcl <sub>2</sub> |               |              |               |
| <b>Guinier analysis</b>                      |                                                              |               |              |               |
| qR <sub>g</sub> max                          | 1.2                                                          | 1.24          | 1.22         | 1.29          |
| R <sub>g</sub> (Å)                           | 43.50± 0.13                                                  | 52.3 ± 1.4    | 51.35± 0.37  | 50.91 ± 0.48  |
| I(0) (cm <sup>-1</sup> )                     | 120.38 ± 0.64                                                | 126.53 ± 2.45 | 136.10 ± 1.6 | 137.94 ± 1.19 |
| <b>GNOM</b>                                  |                                                              |               |              |               |
| R <sub>g</sub> (Å)                           | 49.01                                                        | 54.46         | 54.26        | 56.04         |
| I(0) (cm <sup>-1</sup> )                     | 128.2                                                        | 127.5         | 139.2        | 143.7         |
| D <sub>max</sub> (Å)                         | 183.15                                                       | 196.84        | 194.43       | 210.45        |
| q range (Å <sup>-1</sup> )                   | 0.009-0.255                                                  | 0.008-0.262   | 0.009-0.248  | 0.009-0.275   |

**Supplemental Table 3. NSD metric for the averaging of SAXS model**

| pRNA | Aver | 1    | 2    | 3    | 4    | 5    | 6    | 7    | 8    | 9    | 10   | 11   | 12   | 13   | 14   | 15   | 16   | 17   | 18   | 19   | 20   |
|------|------|------|------|------|------|------|------|------|------|------|------|------|------|------|------|------|------|------|------|------|------|
| 1    | 0.90 | 0.00 | 1.06 | 0.96 | 0.85 | 1.00 | 0.78 | 0.89 | 0.99 | 0.92 | 0.91 | 0.83 | 0.92 | 0.94 | 0.92 | 0.77 | 0.93 | 0.88 | 1.00 | 0.89 | 0.75 |
| 2    | 0.93 | 1.06 | 0.00 | 1.06 | 0.96 | 0.87 | 0.93 | 0.94 | 0.99 | 0.85 | 0.84 | 1.00 | 0.86 | 0.96 | 0.88 | 0.92 | 0.85 | 0.95 | 0.90 | 0.85 | 1.00 |
| 3    | 0.96 | 0.96 | 1.06 | 0.00 | 0.99 | 0.96 | 0.93 | 0.93 | 1.02 | 0.82 | 0.98 | 1.00 | 0.82 | 0.98 | 1.09 | 0.98 | 1.01 | 0.91 | 0.93 | 1.00 | 0.89 |
| 4    | 0.89 | 0.85 | 0.96 | 0.99 | 0.00 | 0.86 | 0.93 | 0.85 | 0.89 | 0.83 | 0.94 | 0.73 | 0.91 | 0.83 | 1.04 | 0.78 | 0.91 | 0.81 | 0.86 | 1.01 | 0.90 |
| 5    | 0.91 | 1.00 | 0.87 | 0.96 | 0.86 | 0.00 | 0.99 | 0.91 | 0.87 | 0.91 | 0.99 | 0.88 | 0.88 | 0.94 | 1.02 | 0.96 | 0.70 | 0.92 | 0.85 | 0.86 | 0.94 |
| 6    | 0.87 | 0.78 | 0.93 | 0.93 | 0.93 | 0.99 | 0.00 | 0.87 | 0.82 | 0.96 | 0.67 | 0.94 | 0.94 | 0.70 | 0.81 | 0.86 | 1.02 | 0.94 | 0.88 | 0.81 | 0.75 |
| 7    | 0.86 | 0.89 | 0.94 | 0.93 | 0.85 | 0.91 | 0.87 | 0.00 | 0.87 | 0.72 | 0.94 | 0.90 | 0.84 | 0.77 | 0.83 | 0.80 | 0.83 | 0.81 | 0.86 | 0.84 | 0.92 |
| 8    | 0.89 | 0.99 | 0.99 | 1.02 | 0.89 | 0.87 | 0.82 | 0.87 | 0.00 | 0.83 | 0.92 | 0.87 | 0.77 | 0.85 | 0.82 | 1.02 | 0.97 | 0.85 | 1.01 | 0.70 | 0.87 |
| 9    | 0.87 | 0.92 | 0.85 | 0.82 | 0.83 | 0.91 | 0.96 | 0.72 | 0.83 | 0.00 | 0.95 | 0.84 | 0.71 | 0.93 | 0.89 | 0.91 | 0.96 | 0.86 | 0.77 | 0.89 | 0.93 |
| 10   | 0.89 | 0.91 | 0.84 | 0.98 | 0.94 | 0.99 | 0.67 | 0.94 | 0.92 | 0.95 | 0.00 | 1.03 | 0.92 | 0.90 | 0.66 | 0.92 | 0.99 | 0.93 | 0.88 | 0.80 | 0.81 |
| 11   | 0.88 | 0.83 | 1.00 | 1.00 | 0.73 | 0.88 | 0.94 | 0.90 | 0.87 | 0.84 | 1.03 | 0.00 | 0.90 | 0.80 | 0.98 | 0.86 | 0.81 | 0.75 | 0.88 | 0.88 | 0.75 |
| 12   | 0.87 | 0.92 | 0.86 | 0.82 | 0.91 | 0.88 | 0.94 | 0.84 | 0.77 | 0.71 | 0.92 | 0.90 | 0.00 | 0.96 | 0.79 | 0.90 | 0.90 | 0.89 | 0.87 | 0.80 | 0.92 |
| 13   | 0.88 | 0.94 | 0.96 | 0.98 | 0.83 | 0.94 | 0.70 | 0.77 | 0.85 | 0.93 | 0.90 | 0.80 | 0.96 | 0.00 | 1.03 | 0.73 | 0.82 | 0.98 | 0.95 | 0.85 | 0.75 |
| 14   | 0.90 | 0.92 | 0.88 | 1.09 | 1.04 | 1.02 | 0.81 | 0.83 | 0.82 | 0.89 | 0.66 | 0.98 | 0.79 | 1.03 | 0.00 | 1.07 | 0.97 | 0.72 | 1.02 | 0.75 | 0.86 |
| 15   | 0.88 | 0.77 | 0.92 | 0.98 | 0.78 | 0.96 | 0.86 | 0.80 | 1.02 | 0.91 | 0.92 | 0.86 | 0.90 | 0.73 | 1.07 | 0.00 | 0.80 | 0.84 | 0.86 | 0.98 | 0.84 |
| 16   | 0.90 | 0.93 | 0.85 | 1.01 | 0.91 | 0.70 | 1.02 | 0.83 | 0.97 | 0.96 | 0.99 | 0.81 | 0.90 | 0.82 | 0.97 | 0.80 | 0.00 | 0.79 | 0.93 | 0.94 | 0.92 |
| 17   | 0.87 | 0.88 | 0.95 | 0.91 | 0.81 | 0.92 | 0.94 | 0.81 | 0.85 | 0.86 | 0.93 | 0.75 | 0.89 | 0.98 | 0.72 | 0.84 | 0.79 | 0.00 | 0.88 | 0.85 | 0.96 |
| 18   | 0.91 | 1.00 | 0.90 | 0.93 | 0.86 | 0.85 | 0.88 | 0.86 | 1.01 | 0.77 | 0.88 | 0.88 | 0.87 | 0.95 | 1.02 | 0.86 | 0.93 | 0.88 | 0.00 | 1.04 | 0.91 |
| 19   | 0.87 | 0.89 | 0.85 | 1.00 | 1.01 | 0.86 | 0.81 | 0.84 | 0.70 | 0.89 | 0.80 | 0.88 | 0.80 | 0.85 | 0.75 | 0.98 | 0.94 | 0.85 | 1.04 | 0.00 | 0.83 |
| 20   | 0.87 | 0.75 | 1.00 | 0.89 | 0.90 | 0.94 | 0.75 | 0.92 | 0.87 | 0.93 | 0.81 | 0.75 | 0.92 | 0.75 | 0.86 | 0.84 | 0.92 | 0.96 | 0.91 | 0.83 | 0.00 |
| Aver | 0.89 | 0.90 | 0.93 | 0.96 | 0.89 | 0.91 | 0.87 | 0.86 | 0.89 | 0.87 | 0.89 | 0.88 | 0.87 | 0.88 | 0.90 | 0.88 | 0.90 | 0.87 | 0.91 | 0.87 | 0.87 |

| Complex | Aver | 1    | 2    | 3    | 4    | 5    | 6    | 7    | 8    | 9    | 10   | 11   | 12   | 13   | 14   | 15   | 16   | 17   | 18   | 19   | 20   |
|---------|------|------|------|------|------|------|------|------|------|------|------|------|------|------|------|------|------|------|------|------|------|
| 1       | 0.66 | 0.00 | 0.70 | 0.62 | 0.65 | 0.63 | 0.64 | 0.64 | 0.69 | 0.66 | 0.77 | 0.60 | 0.61 | 0.78 | 0.67 | 0.61 | 0.68 | 0.64 | 0.69 | 0.67 | 0.69 |
| 2       | 0.68 | 0.70 | 0.00 | 0.65 | 0.67 | 0.71 | 0.58 | 0.73 | 0.68 | 0.60 | 0.74 | 0.72 | 0.71 | 0.72 | 0.64 | 0.64 | 0.61 | 0.68 | 0.70 | 0.62 | 0.73 |
| 3       | 0.67 | 0.62 | 0.65 | 0.00 | 0.66 | 0.67 | 0.60 | 0.71 | 0.70 | 0.69 | 0.73 | 0.63 | 0.62 | 0.82 | 0.66 | 0.68 | 0.61 | 0.71 | 0.71 | 0.59 | 0.72 |
| 4       | 0.68 | 0.65 | 0.67 | 0.66 | 0.00 | 0.72 | 0.63 | 0.71 | 0.66 | 0.70 | 0.67 | 0.71 | 0.69 | 0.73 | 0.62 | 0.66 | 0.66 | 0.69 | 0.72 | 0.64 | 0.70 |
| 5       | 0.69 | 0.63 | 0.71 | 0.67 | 0.72 | 0.00 | 0.73 | 0.67 | 0.64 | 0.70 | 0.70 | 0.70 | 0.68 | 0.84 | 0.61 | 0.68 | 0.69 | 0.69 | 0.80 | 0.61 | 0.74 |
| 6       | 0.67 | 0.64 | 0.58 | 0.60 | 0.63 | 0.73 | 0.00 | 0.70 | 0.70 | 0.54 | 0.71 | 0.61 | 0.69 | 0.74 | 0.65 | 0.64 | 0.68 | 0.66 | 0.74 | 0.72 | 0.68 |
| 7       | 0.68 | 0.64 | 0.73 | 0.71 | 0.71 | 0.67 | 0.70 | 0.00 | 0.76 | 0.58 | 0.67 | 0.62 | 0.70 | 0.69 | 0.68 | 0.79 | 0.66 | 0.61 | 0.63 | 0.77 | 0.66 |
| 8       | 0.71 | 0.69 | 0.68 | 0.70 | 0.66 | 0.64 | 0.70 | 0.76 | 0.00 | 0.71 | 0.68 | 0.72 | 0.71 | 0.74 | 0.71 | 0.74 | 0.70 | 0.74 | 0.72 | 0.73 | 0.76 |
| 9       | 0.66 | 0.66 | 0.60 | 0.69 | 0.70 | 0.70 | 0.54 | 0.58 | 0.71 | 0.00 | 0.70 | 0.63 | 0.69 | 0.74 | 0.68 | 0.70 | 0.60 | 0.57 | 0.64 | 0.70 | 0.68 |
| 10      | 0.70 | 0.77 | 0.74 | 0.73 | 0.67 | 0.70 | 0.71 | 0.67 | 0.68 | 0.70 | 0.00 | 0.63 | 0.67 | 0.70 | 0.71 | 0.78 | 0.68 | 0.70 | 0.70 | 0.69 | 0.72 |
| 11      | 0.65 | 0.60 | 0.72 | 0.63 | 0.71 | 0.70 | 0.61 | 0.62 | 0.72 | 0.63 | 0.63 | 0.00 | 0.57 | 0.73 | 0.74 | 0.68 | 0.68 | 0.66 | 0.60 | 0.62 | 0.60 |
| 12      | 0.66 | 0.61 | 0.71 | 0.62 | 0.69 | 0.68 | 0.69 | 0.70 | 0.71 | 0.69 | 0.67 | 0.57 | 0.00 | 0.73 | 0.76 | 0.67 | 0.62 | 0.66 | 0.56 | 0.65 | 0.61 |
| 13      | 0.74 | 0.78 | 0.72 | 0.82 | 0.73 | 0.84 | 0.74 | 0.69 | 0.74 | 0.74 | 0.70 | 0.73 | 0.73 | 0.00 | 0.73 | 0.72 | 0.70 | 0.73 | 0.72 | 0.76 | 0.80 |
| 14      | 0.68 | 0.67 | 0.64 | 0.66 | 0.62 | 0.61 | 0.65 | 0.68 | 0.71 | 0.68 | 0.71 | 0.74 | 0.76 | 0.73 | 0.00 | 0.56 | 0.68 | 0.72 | 0.78 | 0.62 | 0.71 |
| 15      | 0.68 | 0.61 | 0.64 | 0.68 | 0.66 | 0.68 | 0.64 | 0.79 | 0.74 | 0.70 | 0.78 | 0.68 | 0.67 | 0.72 | 0.56 | 0.00 | 0.69 | 0.71 | 0.72 | 0.59 | 0.66 |
| 16      | 0.66 | 0.68 | 0.61 | 0.61 | 0.66 | 0.69 | 0.68 | 0.66 | 0.70 | 0.60 | 0.68 | 0.68 | 0.62 | 0.70 | 0.68 | 0.69 | 0.00 | 0.67 | 0.61 | 0.63 | 0.65 |
| 17      | 0.68 | 0.64 | 0.68 | 0.71 | 0.69 | 0.69 | 0.66 | 0.61 | 0.74 | 0.57 | 0.70 | 0.66 | 0.66 | 0.73 | 0.72 | 0.71 | 0.67 | 0.00 | 0.63 | 0.71 | 0.63 |
| 18      | 0.68 | 0.69 | 0.70 | 0.71 | 0.72 | 0.80 | 0.74 | 0.63 | 0.72 | 0.64 | 0.70 | 0.60 | 0.56 | 0.72 | 0.78 | 0.72 | 0.61 | 0.60 | 0.00 | 0.71 | 0.59 |
| 19      | 0.67 | 0.67 | 0.62 | 0.59 | 0.64 | 0.61 | 0.72 | 0.77 | 0.73 | 0.70 | 0.69 | 0.62 | 0.65 | 0.76 | 0.62 | 0.59 | 0.63 | 0.71 | 0.71 | 0.00 | 0.68 |
| 20      | 0.68 | 0.69 | 0.73 | 0.72 | 0.70 | 0.74 | 0.68 | 0.66 | 0.76 | 0.68 | 0.72 | 0.60 | 0.61 | 0.80 | 0.71 | 0.66 | 0.65 | 0.63 | 0.59 | 0.68 | 0.00 |
| Aver    | 0.68 | 0.66 | 0.68 | 0.67 | 0.68 | 0.69 | 0.67 | 0.68 | 0.71 | 0.66 | 0.70 | 0.65 | 0.66 | 0.74 | 0.68 | 0.68 | 0.66 | 0.68 | 0.68 | 0.67 | 0.68 |

| AMP-PNP | Aver | 1    | 2    | 3    | 4    | 5    | 6    | 7    | 8    | 9    | 10   | 11   | 12   | 13   | 14   | 15   | 16   | 17   | 18   | 19   | 20   |
|---------|------|------|------|------|------|------|------|------|------|------|------|------|------|------|------|------|------|------|------|------|------|
| 1       | 0.68 | 0.00 | 0.68 | 0.66 | 0.71 | 0.69 | 0.70 | 0.72 | 0.69 | 0.59 | 0.64 | 0.78 | 0.72 | 0.71 | 0.62 | 0.74 | 0.67 | 0.82 | 0.59 | 0.62 | 0.60 |
| 2       | 0.68 | 0.68 | 0.00 | 0.79 | 0.72 | 0.65 | 0.67 | 0.68 | 0.82 | 0.65 | 0.61 | 0.76 | 0.65 | 0.64 | 0.65 | 0.61 | 0.62 | 0.81 | 0.62 | 0.65 | 0.65 |
| 3       | 0.70 | 0.66 | 0.79 | 0.00 | 0.67 | 0.76 | 0.59 | 0.68 | 0.58 | 0.72 | 0.70 | 0.67 | 0.80 | 0.69 | 0.79 | 0.67 | 0.78 | 0.68 | 0.73 | 0.69 | 0.62 |
| 4       | 0.69 | 0.71 | 0.72 | 0.67 | 0.00 | 0.67 | 0.61 | 0.71 | 0.68 | 0.68 | 0.63 | 0.75 | 0.57 | 0.62 | 0.68 | 0.81 | 0.62 | 0.56 | 0.81 | 0.78 | 0.78 |
| 5       | 0.69 | 0.69 | 0.65 | 0.76 | 0.67 | 0.00 | 0.70 | 0.65 | 0.72 | 0.77 | 0.71 | 0.66 | 0.59 | 0.74 | 0.68 | 0.63 | 0.66 | 0.70 | 0.69 | 0.70 | 0.71 |
| 6       | 0.69 | 0.70 | 0.67 | 0.59 | 0.61 | 0.70 | 0.00 | 0.69 | 0.73 | 0.67 | 0.70 | 0.61 | 0.77 | 0.67 | 0.63 | 0.69 | 0.79 | 0.69 | 0.67 | 0.78 | 0.74 |
| 7       | 0.69 | 0.72 | 0.68 | 0.68 | 0.71 | 0.65 | 0.69 | 0.00 | 0.74 | 0.79 | 0.58 | 0.64 | 0.67 | 0.69 | 0.73 | 0.62 | 0.62 | 0.72 | 0.71 | 0.71 | 0.77 |
| 8       | 0.71 | 0.69 | 0.82 | 0.58 | 0.71 | 0.72 | 0.73 | 0.74 | 0.00 | 0.79 | 0.70 | 0.71 | 0.67 | 0.73 | 0.67 | 0.65 | 0.70 | 0.73 | 0.77 | 0.68 | 0.69 |
| 9       | 0.70 | 0.59 | 0.65 | 0.72 | 0.68 | 0.77 | 0.67 | 0.79 | 0.79 | 0.00 | 0.62 | 0.77 | 0.77 | 0.69 | 0.67 | 0.78 | 0.68 | 0.70 | 0.65 | 0.71 | 0.58 |
| 10      | 0.65 | 0.64 | 0.61 | 0.70 | 0.68 | 0.71 | 0.70 | 0.58 | 0.70 | 0.62 | 0.00 | 0.73 | 0.67 | 0.58 | 0.66 | 0.65 | 0.55 | 0.74 | 0.64 | 0.63 | 0.60 |
| 11      | 0.70 | 0.78 | 0.76 | 0.67 | 0.63 | 0.66 | 0.61 | 0.64 | 0.71 | 0.77 | 0.73 | 0.00 | 0.76 | 0.70 | 0.66 | 0.64 | 0.71 | 0.56 | 0.71 | 0.82 | 0.81 |
| 12      | 0.71 | 0.72 | 0.65 | 0.80 | 0.75 | 0.59 | 0.77 | 0.67 | 0.67 | 0.77 | 0.67 | 0.76 | 0.00 | 0.68 | 0.69 | 0.64 | 0.67 | 0.74 | 0.74 | 0.71 | 0.71 |
| 13      | 0.68 | 0.71 | 0.64 | 0.69 | 0.57 | 0.74 | 0.67 | 0.69 | 0.73 | 0.69 | 0.58 | 0.70 | 0.68 | 0.00 | 0.60 | 0.64 | 0.72 | 0.62 | 0.59 | 0.80 | 0.77 |
| 14      | 0.67 | 0.62 | 0.65 | 0.79 | 0.62 | 0.68 | 0.63 | 0.73 | 0.67 | 0.67 | 0.66 | 0.66 | 0.69 | 0.60 | 0.00 | 0.67 | 0.71 | 0.68 | 0.61 | 0.72 | 0.71 |
| 15      | 0.66 | 0.74 | 0.61 | 0.67 | 0.68 | 0.63 | 0.69 | 0.62 | 0.65 | 0.78 | 0.65 | 0.64 | 0.64 | 0.64 | 0.67 | 0.00 | 0.65 | 0.64 | 0.65 | 0.66 | 0.68 |
| 16      | 0.70 | 0.67 | 0.62 | 0.78 | 0.81 | 0.66 | 0.79 | 0.62 | 0.70 | 0.68 | 0.55 | 0.71 | 0.67 | 0.72 | 0.71 | 0.65 | 0.00 | 0.77 | 0.74 | 0.70 | 0.70 |
| 17      | 0.71 | 0.8  |      |      |      |      |      |      |      |      |      |      |      |      |      |      |      |      |      |      |      |

| ADP  | Aver | 1    | 2    | 3    | 4    | 5    | 6    | 7    | 8    | 9    | 10   | 11   | 12   | 13   | 14   | 15   | 16   | 17   | 18   | 19   | 20   |
|------|------|------|------|------|------|------|------|------|------|------|------|------|------|------|------|------|------|------|------|------|------|
| 1    | 0.67 | 0.00 | 0.56 | 0.67 | 0.63 | 0.71 | 0.70 | 0.75 | 0.62 | 0.59 | 0.60 | 0.72 | 0.74 | 0.67 | 0.80 | 0.62 | 0.63 | 0.68 | 0.77 | 0.73 | 0.63 |
| 2    | 0.69 | 0.56 | 0.00 | 0.66 | 0.58 | 0.70 | 0.75 | 0.71 | 0.69 | 0.62 | 0.68 | 0.64 | 0.77 | 0.73 | 0.89 | 0.65 | 0.60 | 0.72 | 0.79 | 0.71 | 0.67 |
| 3    | 0.74 | 0.67 | 0.66 | 0.00 | 0.82 | 0.62 | 0.75 | 0.81 | 0.75 | 0.78 | 0.80 | 0.58 | 0.74 | 0.78 | 0.85 | 0.70 | 0.69 | 0.70 | 0.76 | 0.79 | 0.74 |
| 4    | 0.70 | 0.63 | 0.58 | 0.82 | 0.00 | 0.79 | 0.68 | 0.75 | 0.63 | 0.59 | 0.74 | 0.72 | 0.72 | 0.70 | 0.77 | 0.66 | 0.64 | 0.70 | 0.70 | 0.78 | 0.73 |
| 5    | 0.74 | 0.71 | 0.70 | 0.62 | 0.79 | 0.00 | 0.78 | 0.73 | 0.74 | 0.83 | 0.74 | 0.65 | 0.77 | 0.75 | 0.78 | 0.73 | 0.74 | 0.78 | 0.78 | 0.80 | 0.75 |
| 6    | 0.70 | 0.70 | 0.75 | 0.75 | 0.68 | 0.78 | 0.00 | 0.64 | 0.64 | 0.77 | 0.81 | 0.73 | 0.69 | 0.75 | 0.69 | 0.64 | 0.61 | 0.63 | 0.64 | 0.67 | 0.79 |
| 7    | 0.74 | 0.75 | 0.71 | 0.81 | 0.75 | 0.73 | 0.64 | 0.00 | 0.78 | 0.72 | 0.86 | 0.80 | 0.76 | 0.86 | 0.82 | 0.75 | 0.70 | 0.68 | 0.66 | 0.61 | 0.76 |
| 8    | 0.70 | 0.62 | 0.69 | 0.75 | 0.63 | 0.74 | 0.64 | 0.78 | 0.00 | 0.69 | 0.75 | 0.75 | 0.63 | 0.73 | 0.84 | 0.70 | 0.64 | 0.70 | 0.63 | 0.70 | 0.75 |
| 9    | 0.71 | 0.59 | 0.62 | 0.78 | 0.59 | 0.83 | 0.77 | 0.72 | 0.69 | 0.00 | 0.65 | 0.80 | 0.73 | 0.70 | 0.82 | 0.68 | 0.70 | 0.70 | 0.72 | 0.75 | 0.61 |
| 10   | 0.72 | 0.60 | 0.68 | 0.80 | 0.74 | 0.74 | 0.81 | 0.86 | 0.75 | 0.65 | 0.00 | 0.75 | 0.70 | 0.54 | 0.70 | 0.76 | 0.76 | 0.73 | 0.80 | 0.82 | 0.58 |
| 11   | 0.74 | 0.72 | 0.64 | 0.58 | 0.72 | 0.65 | 0.73 | 0.80 | 0.75 | 0.80 | 0.75 | 0.00 | 0.78 | 0.81 | 0.83 | 0.69 | 0.70 | 0.76 | 0.76 | 0.79 | 0.76 |
| 12   | 0.71 | 0.74 | 0.77 | 0.74 | 0.72 | 0.77 | 0.69 | 0.76 | 0.63 | 0.73 | 0.70 | 0.78 | 0.00 | 0.68 | 0.63 | 0.67 | 0.71 | 0.68 | 0.67 | 0.78 | 0.68 |
| 13   | 0.72 | 0.67 | 0.73 | 0.78 | 0.70 | 0.75 | 0.75 | 0.86 | 0.73 | 0.70 | 0.54 | 0.81 | 0.68 | 0.00 | 0.64 | 0.68 | 0.70 | 0.70 | 0.75 | 0.84 | 0.59 |
| 14   | 0.78 | 0.80 | 0.89 | 0.85 | 0.77 | 0.78 | 0.69 | 0.82 | 0.84 | 0.82 | 0.70 | 0.83 | 0.63 | 0.64 | 0.00 | 0.72 | 0.83 | 0.79 | 0.81 | 0.83 | 0.68 |
| 15   | 0.69 | 0.62 | 0.65 | 0.70 | 0.66 | 0.73 | 0.64 | 0.75 | 0.70 | 0.68 | 0.76 | 0.69 | 0.67 | 0.68 | 0.72 | 0.00 | 0.66 | 0.66 | 0.73 | 0.75 | 0.66 |
| 16   | 0.69 | 0.63 | 0.60 | 0.69 | 0.64 | 0.74 | 0.61 | 0.70 | 0.64 | 0.70 | 0.76 | 0.70 | 0.71 | 0.70 | 0.83 | 0.66 | 0.00 | 0.69 | 0.74 | 0.67 | 0.76 |
| 17   | 0.70 | 0.68 | 0.72 | 0.70 | 0.70 | 0.78 | 0.63 | 0.68 | 0.70 | 0.70 | 0.73 | 0.76 | 0.68 | 0.70 | 0.79 | 0.66 | 0.69 | 0.00 | 0.64 | 0.63 | 0.67 |
| 18   | 0.73 | 0.77 | 0.79 | 0.76 | 0.70 | 0.78 | 0.64 | 0.66 | 0.63 | 0.72 | 0.80 | 0.76 | 0.67 | 0.75 | 0.81 | 0.73 | 0.74 | 0.64 | 0.00 | 0.75 | 0.73 |
| 19   | 0.74 | 0.73 | 0.71 | 0.79 | 0.78 | 0.80 | 0.67 | 0.61 | 0.70 | 0.75 | 0.82 | 0.79 | 0.78 | 0.84 | 0.83 | 0.75 | 0.67 | 0.63 | 0.75 | 0.00 | 0.73 |
| 20   | 0.70 | 0.63 | 0.67 | 0.74 | 0.73 | 0.75 | 0.79 | 0.76 | 0.75 | 0.61 | 0.58 | 0.76 | 0.68 | 0.59 | 0.68 | 0.66 | 0.76 | 0.67 | 0.73 | 0.73 | 0.00 |
| Aver | 0.72 | 0.67 | 0.69 | 0.74 | 0.70 | 0.74 | 0.70 | 0.74 | 0.70 | 0.71 | 0.72 | 0.74 | 0.71 | 0.72 | 0.78 | 0.69 | 0.69 | 0.70 | 0.73 | 0.74 | 0.70 |
